# Supplementary material for: Inhibition of Glioma Development by ASCL1-Mediated Direct Neuronal Reprogramming
Source: PubMed Central journal article supplement (PMC6627512; doi:10.3390/cells8060571), 2019-06-11
Supplement: cells-08-00571-s001.pdf [file cells-08-00571-s001.pdf]

## Supplementary Material

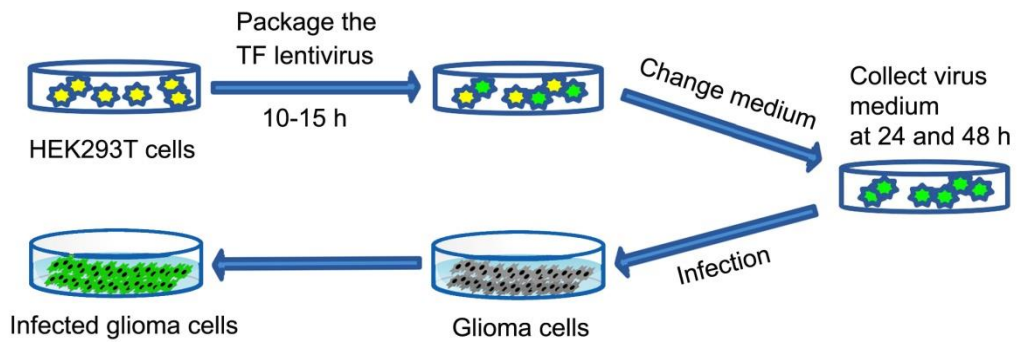

**Supplementary Figure 1 Experimental scheme of lentivirus packaging, collection and infection.** TF, transcription factor. HEK293T cells (human embryonic kidney cells) were used to package the TF-expressing lentivirus.

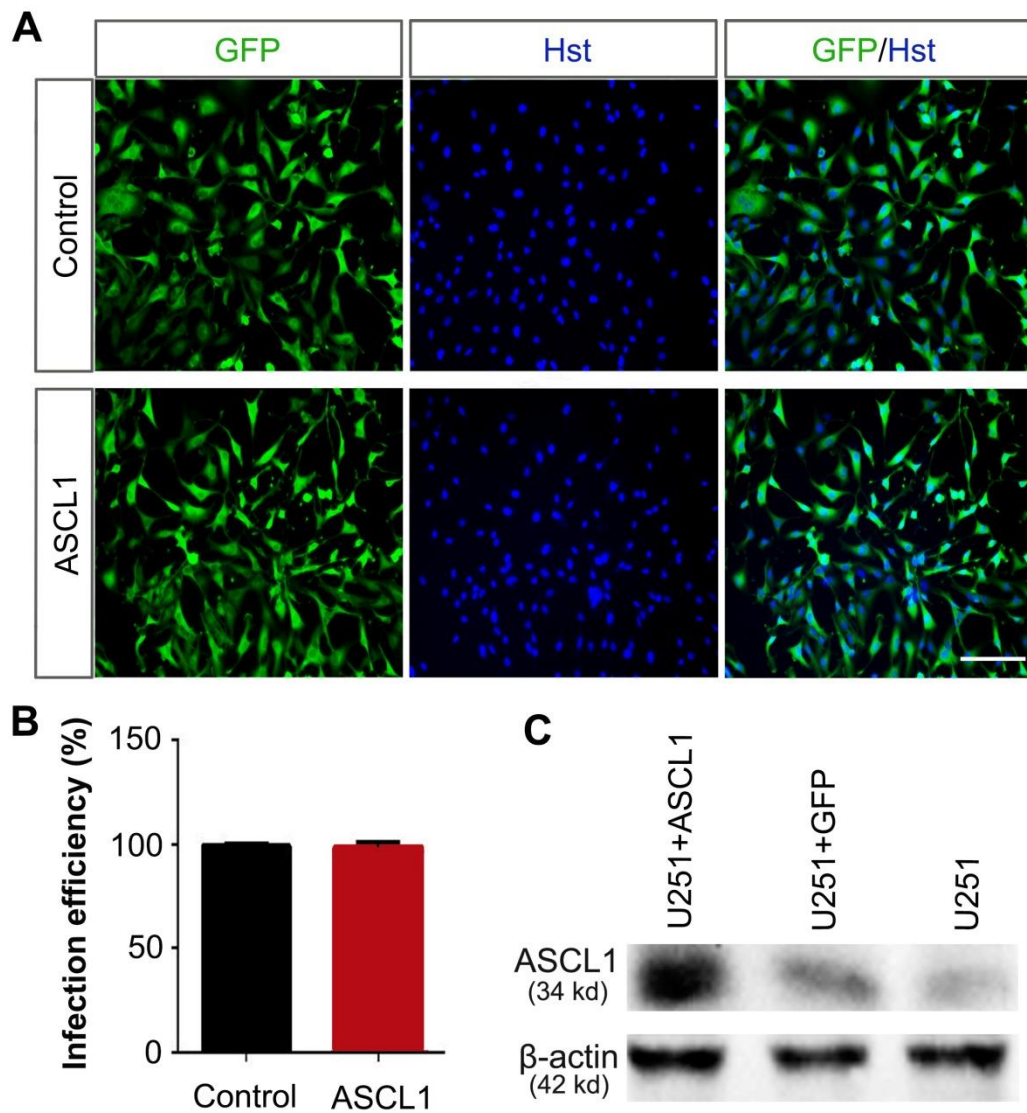

**Supplementary Figure 2 Infection of human glioma cells with ASCL1-expressing lentivirus. (A and B)** U251 cells were infected with lentivirus expressing ASCL1 or control GFP. At 2 dpi, immunocytochemical analysis was performed to determine the infection efficiency. **(C)** After infection of U251 cells with lentivirus, the ASCL1 expression was confirmed by western blot at 5 dpi. Scales = 100  $\mu$ m

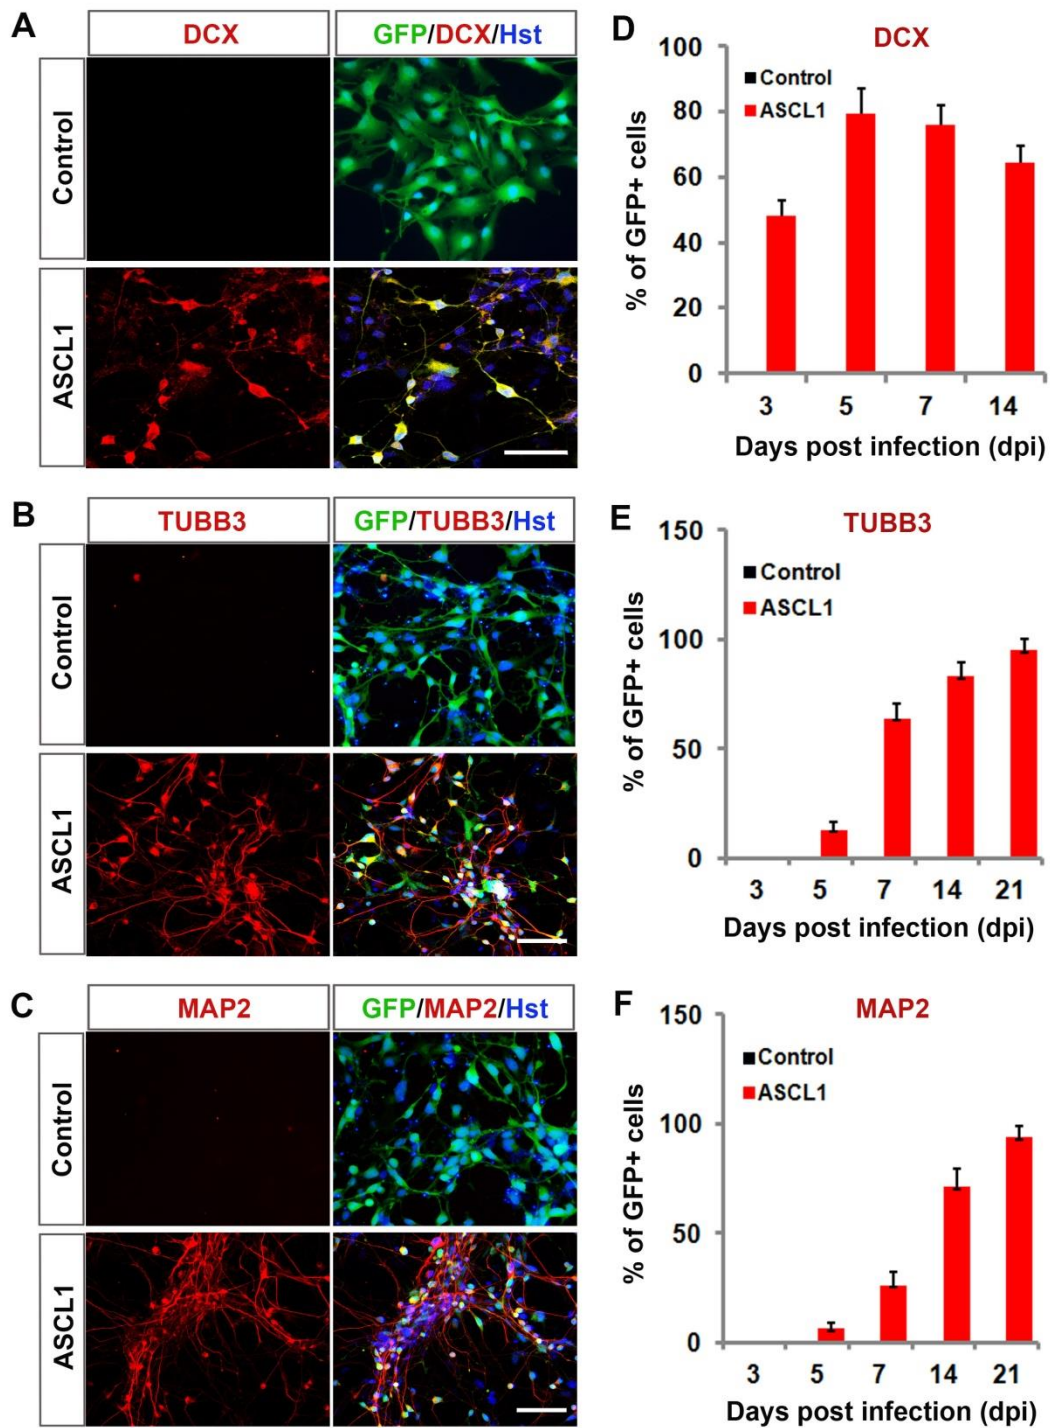

**Supplementary Figure 3** Time-course analysis of ASCL1-mediated neuronal reprogramming of U87 human glioma cells. (A-C) Immunostaining of neuronal markers DCX, TUBB3 and MAP2 in ASCL1-converted cells at 14 dpi. (D-F) Quantification of neuronal marker expressing in ASCL1-infected U87 cells during the indicated course (n=20 random fields from triplicated samples). Scales: 100  $\mu$ m.

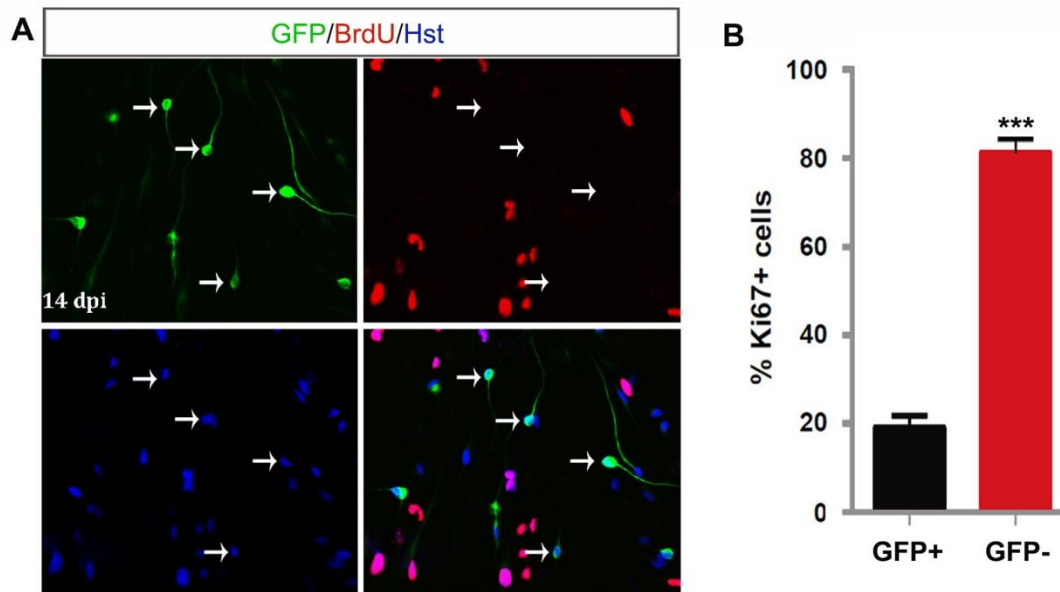

**Supplementary Figure 4 Inhibition of glioma cell proliferation by ASCL1-mediated neuronal reprogramming. (A)** Immunocytochemical analysis of the proliferation of U251 cells by Ki67 staining at 14 dpi (n=20 randomly selected fields from triplicate samples). Arrows indicate the ASCL1-expressing cells (GFP+) that acquired a neuron-like morphology and were negative for Ki67. **(B)** Quantification of Ki67-positive cells in ASCL1-infected (GFP+) and ASCL1-noninfected (GFP-) group. \*\*\* $P < 0.001$  by Student's  $t$ -test. Scales = 100  $\mu$ m.

**Supplementary Table 1. Primary antibodies used for immunostaining**

| <b>Antibody</b>                            | <b>Host</b> | <b>Dilution</b> | <b>Source</b> | <b>Catalog number</b> |
|--------------------------------------------|-------------|-----------------|---------------|-----------------------|
| BrdU (5-bromodeoxyuridine)                 | Rat         | 1:100           | ThermoFisher  | MA1-82088             |
| ChAT (Choline acetyltransferase)           | Goat        | 1:100           | Millipore     | AB144P                |
| DCX (Doublecortin)                         | Rabbit      | 1:100           | CST           | 4604S                 |
| GABA ( $\gamma$ -aminobutyric acid)        | Rabbit      | 1:100           | Sigma         | A2052                 |
| GFP (Green fluorescent protein)            | Chicken     | 1:600           | AVES LABS     | 1020                  |
| Ki67                                       | Mouse       | 1:100           | Abcam         | ab6526                |
|                                            | Rabbit      | 1:100           | CST           | 9129S                 |
| MAP2 (Microtubule-associated protein-2)    | Rabbit      | 1:100           | Abcam         | Ab32454               |
| TUBB3 (Tubulin beta-3)                     | Mouse       | 1:100           | Biologend     | 801202                |
|                                            | Rabbit      | 1:100           | Abcam         | AB18207               |
| vGluT1 (Vesicular glutamate transporter 1) | Rabbit      | 1:100           | SYSY          | 135302                |
| SYN-1 (Synapsin-1)                         | Rabbit      | 1:100           | CST           | 5297S                 |
